# Supplementary material for: Identification and evaluation of the inhibitory effect of Prunella vulgaris extract on SARS-coronavirus 2 virus entry
Source: PubMed Central journal article supplement (PMC8189562; doi:10.1371/journal.pone.0251649), 2021-06-09

Fig. 1C, Western blot, lane 1,2,3,4

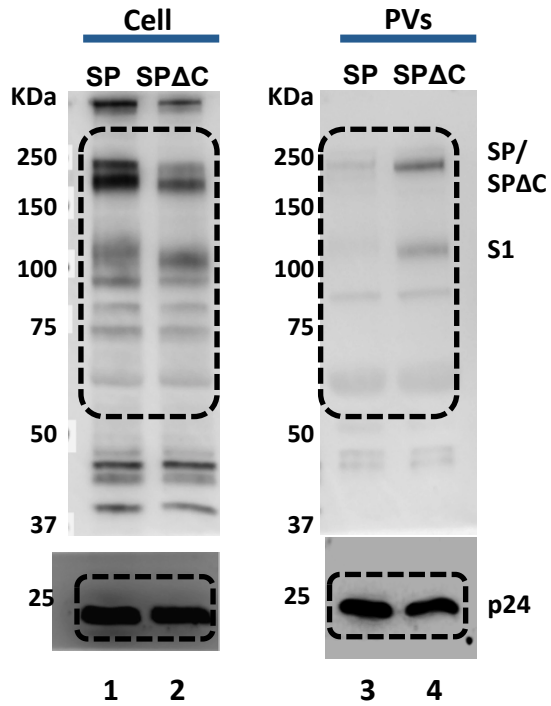

Fig. 2C. Western blot, lane 1,2,3

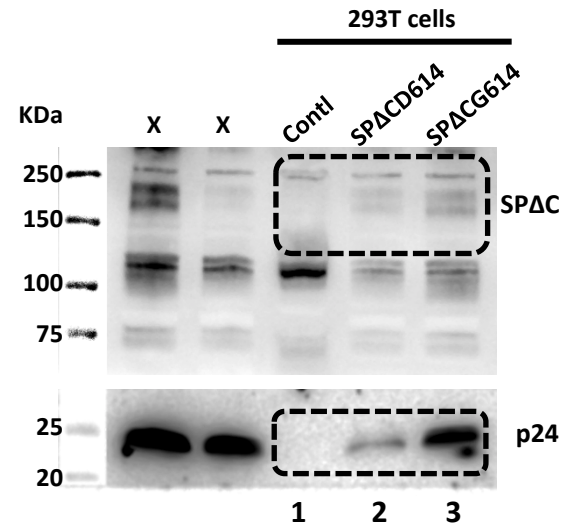

Fig. 2C, Western blot, lane 4 and 5

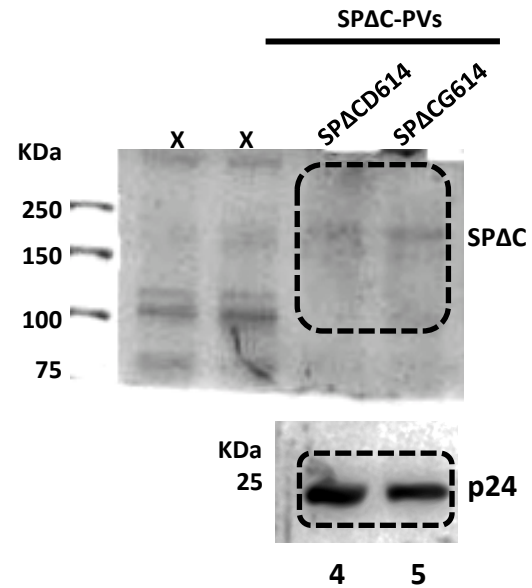

Fig. 2B, Western blot

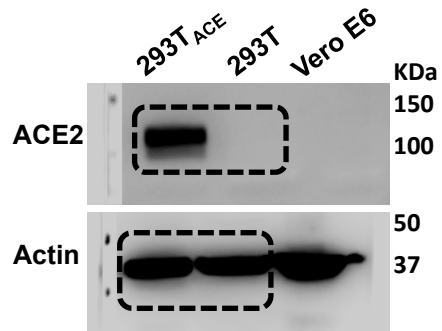

Supplement: pone.0251649.s001.pdf [file pone.0251649.s001.pdf]
